# Supplementary material for: Initial experience of preoperative short-course radiotherapy followed by oxaliplatin-based consolidation chemotherapy for locally advanced rectal cancer
Source: Research Square preprint supplement (doi:10.21203/rs.3.rs-165028/v1), 2021-01-29
Supplement: Supplementary file 1 [file 19124ea6ddac9718e8bee0db.docx]

**Supplemental Figure S1.** MRI and gross pathology findings. A. Oblique axial T2-weighted image in pre-treatment MRI (cT3a) B. Oblique axial T2-weighted image in post-treatment MRI (yTx, mrTRG2) C. Gross finding of specimen (no residual tumor)


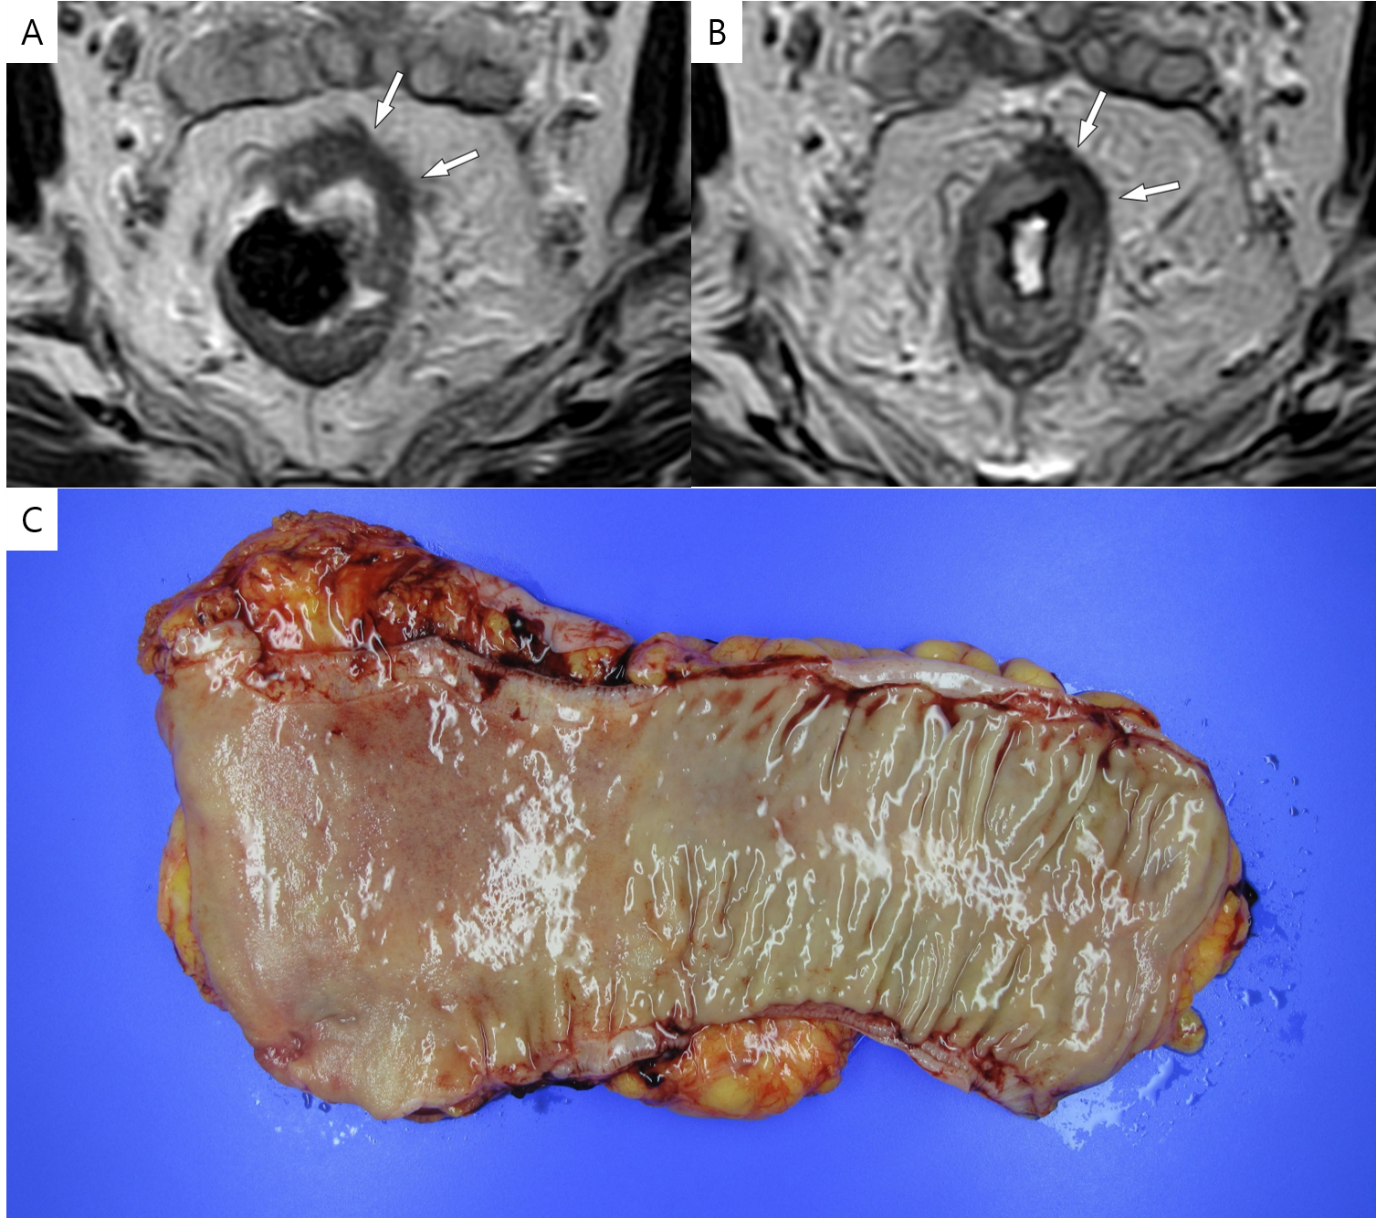


Abbreviations: MRI, magnetic resonance imaging; mrTRG, magnetic resonance tumor regression grade.
